# Supplementary material for: Dynamic ionic radius of alkali metal ions in aqueous solution: a pulsed-field gradient NMR study
Source: Royal Society of Chemistry journal article supplement (doi:10.1039/d1ra02301b), 2021-01-01
Supplement: d1ra02301b1.pdf [file d1ra02301b1.pdf]

## Electronic Supplementary Information (ESI)

### Dynamic Ionic Radii of Alkali Metal Ions in Aqueous Solution: A Pulsed-Field Gradient NMR Study

Kikuko Hayamizu<sup>\*a</sup>, Yusuke Chiba<sup>b</sup>, and Tomoyuki Haishi<sup>c</sup>

<sup>a</sup>Institute of Applied Physics, Tsukuba University, Tennodai, Tsukuba 305-8573, Japan.

<sup>b</sup>Graduate School of Pure and Applied Sciences and Tsukuba Research Center for Energy, Materials Science (TREMS), University of Tsukuba, Tennodai, Tsukuba 305-8573, Japan

<sup>c</sup>MRTechnology, TCI-B5, Sengen, Tsukuba 305-0047, Japan

#### PFG-NMR pulse sequences

Diffusion constants of NMR-active nuclei can be observed by the pulsed-field gradient (PFG) NMR method. Basically, two equivalent PFGs are applied on the Hahn pulse sequence shown in Figure S1(a). The echo attenuations are observed with varying PFG magnitude. When the spin-spin relaxation time is short, the stimulated echo (STE) pulse sequence is used in Figure S1(b). In this study, well-shaped rectangular PFGs are used.

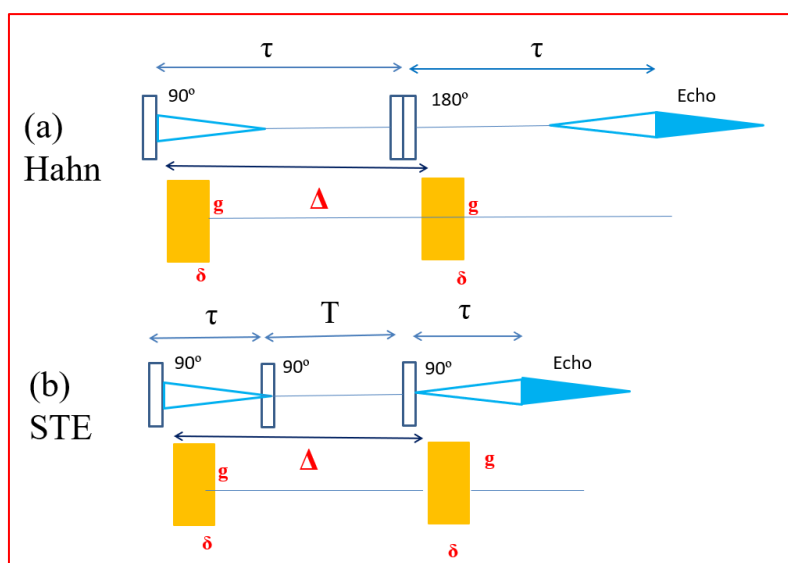

Fig. S1 PFG-NMR pulse sequences for (a) Hahn echo and (b) Stimulated echo.

Two equivalent PFGs with the strength  $g$  and duration time  $\delta$  are applied by the time interval  $\Delta$ . By varying  $g \times \delta$ , the echo attenuation decay signals are observed. The echo attenuation  $S$  values normalized observed by the smallest  $g \times \delta$  are plotted following to the Stejskal and Tanner equation (1)

$$S(g, \delta, \Delta) = \frac{E}{E_0} = \exp\left(-\gamma^2 \delta^2 g^2 D \left(\Delta - \frac{\delta}{3}\right)\right) = \exp(-bD) \quad (1),$$

$\gamma$  is the gyromagnetic ratio of the observing nucleus and  $D$  is the diffusion constant.

When the PFG is a rectangle with good shape, the  $D$  values agree whether the measurement is made by varying  $\delta$  with a fixed  $g$  or by varying  $g$  with a fixed  $\delta$ .<sup>S1</sup> In heterogenous systems,  $D$  values sometimes depend on  $\Delta$  and  $g$ , and  $g$ -fixed measurements are reliable.

The measuring conditions of  ${}^7\text{Li}^+$ ,  ${}^{23}\text{Na}^+$ , and  ${}^{133}\text{Cs}^+$  in the aqueous solvent are following.  ${}^7\text{Li}$ :  $g = 1.26 \text{ Tm}^{-1}$  and  $\delta = 0.2 \sim 2 \text{ ms}$  (varied). For various  $\Delta$  values from 20 to 100 ms, the determined values of  $D_{\text{Li}}$  agreed within experimental errors in the diluted region (less than 2 M).

${}^{23}\text{Na}$ :  $g = 1.26 \text{ Tm}^{-1}$  and  $\delta = 0.2 \sim 2 \text{ ms}$  (varied). For various  $\Delta$  values from 20 to 100 ms. The determined value of  $D_{\text{Na}}$  agreed within experimental errors in the diluted region (less than 2 M).

${}^{133}\text{Cs}$ :  $g = 1.26 \text{ Tm}^{-1}$ ,  $\Delta = 100 \text{ ms}$ ,  $\delta = 0.2 \sim 2 \text{ ms}$  (varied).

### Diffusion measurement of ${}^{87}\text{Rb}$

Because of extremely short relaxation times of  ${}^{87}\text{Rb}$  ( $T_1 = 1.8 \text{ ms}$  and  $T_2 = 1.2 \text{ ms}$ ), the  ${}^{87}\text{Rb}$  diffusion constant was measured by the stimulated pulse sequence with strict measuring conditions in Fig. S2. Eddy current effect disappeared within 0.2 ms after the application of the PFG ( $10 \text{ Tm}^{-1}$ ) in the present measuring conditions. The eddy current length was already examined.<sup>S2</sup>

Due to very short  $T_1$  and  $T_2$  of  ${}^{87}\text{Rb}$  due to large nuclear quadrupole moment ( $Q$ ) in Table 1, the setting of the PFG measuring parameters is limited to a short  $\Delta$  value. Because of the uniform  $\text{Rb}^+$  aqueous solution, negligible  $\Delta$  dependence of  $D_{\text{Rb}}$  can be assumed.

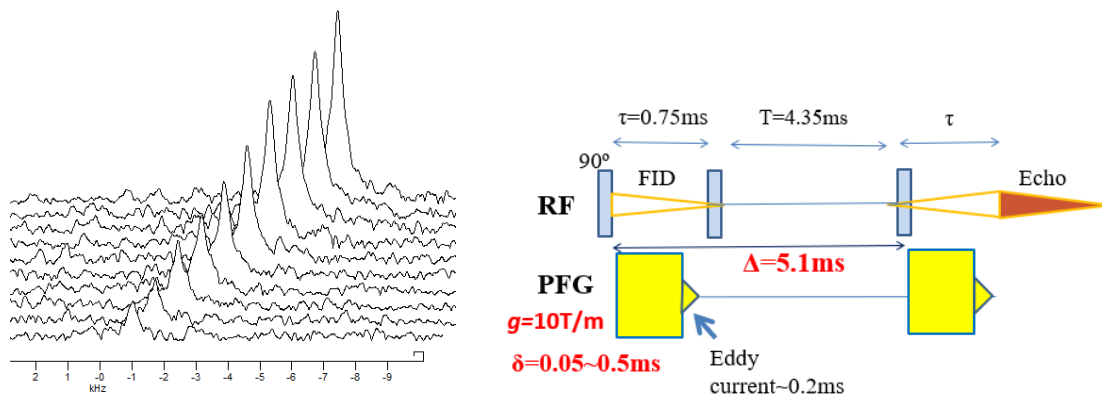

Fig. S2  $^{87}\text{Rb}$  echo attenuation signals measured by the STE pulse sequence shown in the right. The PFG strength,  $g$  was  $10.0 \text{ Tm}^{-1}$ ,  $\tau = 0.75 \text{ ms}$  (setting of short  $\tau$  was possible because of fast decay of the eddy current effects, about  $0.2 \text{ ms}$ ),  $\Delta = 5.1 \text{ ms}$ , and  $\delta = 0.05 \sim 0.5 \text{ ms}$  (varied). An overnight accumulation was performed (about 8,000 accumulations).

### Stokes-Einstein relationship for pure $\text{H}_2\text{O}$

The relationship between a diffusion constant ( $D$ ) and viscosity ( $\eta$ ) is well established by the Stokes-Einstein (SE) equation (S1) with unestablished constant  $c$  (theoretically between 4 and 6) and the Stokes radius  $r_s$  for a diffusing particle.

$$D = \frac{1}{c} \frac{kT}{r_s \pi \eta} \quad (\text{S1})$$

The temperature-dependent experimental values of  $D^{\text{S3}}$  and  $\eta^{\text{S4}}$  are available for pure  $\text{H}_2\text{O}$ . The  $D_{\text{H}_2\text{O}}$  is plotted versus  $kT/\pi\eta$  in Fig. S3.

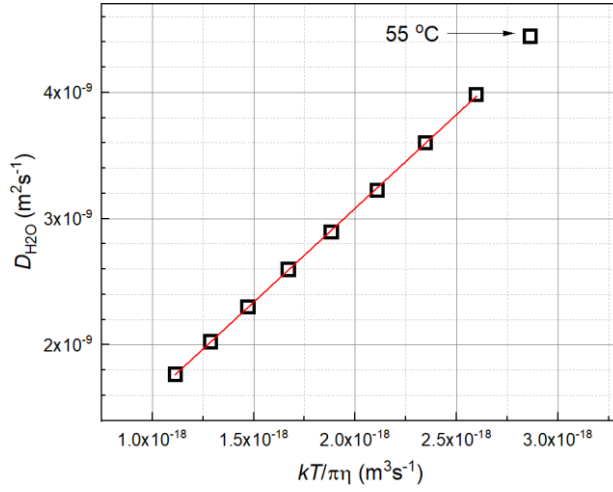

Fig. S3 Experimental  $D_{\text{H}_2\text{O}}$  is plotted versus  $kT/\pi\eta$ .

The good linear relationship between  $D$  and  $kT/\pi\eta$  was obtained excluding a  $D_{\text{H}_2\text{O}}$  data at 55 °C. The deviation of the  $D$  value towards larger one is probably the convection effect (compared with our unpublished data measured by using a specified NMR sample tube<sup>S5</sup>). From eqn (S1), the gradient is equal to  $1/cr_s$  and the calculated  $cr_s$  is the experimental constant in the SE relation. The experimental value,  $cr_s = 673$  pm. The ionic radius of  $\text{H}_3\text{O}^+$  ( $r_s = 141$  pm<sup>S6</sup>) suggests the constant  $c = 4.8$  for  $\text{H}_2\text{O}$  in the SE relation, which is between the theoretical values 4 and 6 for the slit and stick boundary conditions. When the  $c$  value is assumed to be 4 or 6, the radius of  $\text{H}_2\text{O}$  becomes 168 or 112 pm, respectively. It is noted that the bond length of O-H in  $\text{H}_2\text{O}$  is 96 pm, which is a base to calculate van der Waals volume of  $\text{H}_2\text{O}$  molecule.

### Relations of $D_{\text{Li}}-D_{\text{H}_2\text{O-Li}}$ and $D_{\text{Na}}-D_{\text{H}_2\text{O-Na}}$ against the salt concentration

From the SE relation, the ratio of the diffusion constants is related to the size of diffusing species ( $r_s$ ) as

$$D_{\text{H}_2\text{O}}/D_{\text{Li}} \propto r_s(\text{Li})/r_s(\text{H}_2\text{O})$$

$$D_{\text{H}_2\text{O}}/D_{\text{Na}} \propto r_s(\text{Na})/r_s(\text{H}_2\text{O})$$

The ratios were calculated for  $\text{Li}^+$  and  $\text{Na}^+$  systems and plotted against the salt concentration (Fig. S4).

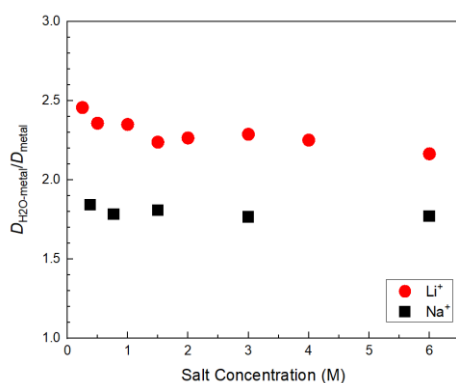

Fig. S4 Ratios of  $D_{\text{H}_2\text{O-Li}}/D_{\text{Li}}$  and  $D_{\text{H}_2\text{O-Na}}/D_{\text{Na}}$  are plotted against the salt concentration.

The ratio of  $\text{Li}^+$  system changed from 2.45 to 2.25 with increasing the salt concentration and that of  $\text{Na}^+$  system was almost constant around 1.8. It is clearly shown that  $\text{Li}^+$  is more hydrated than  $\text{Na}^+$ , but it is not certain that in the dilution limit  $\text{Li}^+$  is more hydrated and  $\text{Na}^+$  is not dependent on the salt concentration in hydration.

## References

- S1. K. Hayamizu, S. Seki, T. Haishi, Lithium ion micrometer diffusion in a garnet-type cubic  $\text{Li}_7\text{La}_3\text{Zr}_2\text{O}_{12}$  (LLZO) studied using  $^7\text{Li}$  NMR spectroscopy. *J. Chem. Phys.*, 2017, **146**, 024701. 10.1063/1.4973827
- S2. K. Hayamizu, S. Seki, Long-range Li ion diffusion in NASICON-type  $\text{Li}_{1.5}\text{Al}_{0.5}\text{Ge}_{1.5}(\text{PO}_4)_3$  (LAGP) studied by  $^7\text{Li}$  pulsed-gradient spin-echo NMR. *Phys. Chem. Chem. Phys.* 2017, **19**, 23485-23491. 10.1039/c7cp03647g
- S3. M. Holz, S. R. Heil, A. Sacco, Temperature-dependent self-diffusion coefficients of water and six selected molecular liquids for calibration in accurate  $^1\text{H}$  NMR PFG measurements. *Phys. Chem. Chem. Phys.*, 2000, **2**, 4740-4742. 10.1039/b005319h
- S4. [https:// wiki.anton-paar.com/jp-jp/water/](https://wiki.anton-paar.com/jp-jp/water/), accessed January 15, 2021.
- S5. K. Hayamizu, W. S. Price, A new type of sample tube for reducing convection effects in PGSE-NMR measurements of self-diffusion coefficients of liquid samples. *J. Magn. Reson.* 2004, **167**, 328-333. 10.1016/j.jmr.2004.01.006
- S6. Y. Marcus, Ionic radii in aqueous solutions. *Chem. Rev.* 1988, **88**, 1475-1498. 10.1021/cr00090a003
